# Supplementary material
Source: PubMed Central journal article supplement (PMC9302910)
Supplement: Appendix_A.pdf [file Appendix_A.pdf]

## Appendix A: Patient and Clinician Surveys

### Survey 1. Patient Virtual Treatment Daily Feedback Survey

Please rate the quality of your virtual treatment today (*range of 1–10, where 1 = lowest and 10 = highest*).

### Survey 2. Patient Virtual Behavioral Health Satisfaction Survey (Discharge)

This is a brief survey about your experience in virtual programs. Survey responses will be anonymous and will be used to improve our services. Thank you for your feedback!

1. How would you rate this video treatment experience compared to an in-person treatment experience?
  - Very similar
  - Somewhat similar
  - Neutral
  - Somewhat different
  - Very different
2. In the future, I would prefer to receive behavioral health services in a remote video format.
  - Yes
  - Probably Yes
  - Not Sure
  - Probably No
  - No

### Survey 3. Clinician Virtual Treatment Feedback Survey

1. How difficult/easy was it to implement Virtual Treatment Services?
  - Very easy
  - Easy
  - Neither difficult nor easy
  - Difficult
  - Very difficult
2. Do you prefer providing in person or virtual treatment services?
  - I strongly prefer providing in person services
  - I somewhat prefer providing in person services
  - I prefer both equally/ am neutral
  - I somewhat prefer providing virtual services
  - I strongly prefer providing virtual services
3. Do you feel you are more or less effective in delivering clinical content to patients on the virtual platform compared to traditional treatment?
  - More effective virtually
  - Slightly more effective virtually
  - Neutral/ equally effective
  - Slightly less effective virtually
  - Less effective virtually
4. If given the option between continuing to provide Virtual Treatment Services or returning to providing in-person treatment services, how likely is it that you would choose to continue providing Virtual Treatment?
  - Very likely
  - Somewhat likely
  - Neither likely or unlikely
  - Somewhat unlikely
  - Very unlikely
5. Rate your overall experience providing treatment services virtually (*range of 1–10, where 1 = lowest and 10 = highest*).
